# Supplementary material for: Synthesis and Biological Evaluation of NH2-Sulfonyl Oseltamivir Analogues as Influenza Neuraminidase Inhibitors
Source: MDPI journal article supplement (doi:10.3390/molecules24112176), 2019-06-10
Supplement: s1 [file s1]

## Supporting information

### Synthesis and Biological Evaluation of $NH_2$ -Sulfonyl Oseltamivir Analogues as Influenza Neuraminidase Inhibitors

Yaping Hu<sup>1</sup>, Binfeng Chen<sup>1</sup>, Zaiqiang Lei<sup>1</sup>, Hongqian Zhao<sup>1</sup>, Hongxi

Zhu<sup>1</sup>, Peng Quan<sup>2,\*</sup>, Yongshou Tian<sup>1,\*</sup>

<sup>1</sup> *Key Laboratory of Structure-Based Drug Design and Discovery, Ministry of Education, School of Pharmaceutical Engineering, Shenyang Pharmaceutical University, Shenyang 110016, Liaoning, China; hyp910309@163.com (Y.H); yh\_cbf@163.com (B.C); ZaiqiangLei@126.com (Z.L); zhaohongqian999@163.com (H.Z); 13125557362@163.com (H.Z.)*

<sup>2</sup> *School of Pharmacy, Shenyang Pharmaceutical University, Shenyang 110016, Liaoning, China*

\* Correspondence: quanpeng81@163.com (P.Q.); tianys@syphu.edu.cn (Y.T.);

Tel.: +86-24-4352-0511 (P.Q.); +86-24-4352-0511 (Y.T.)

The copies of spectrum for compounds 4a-4k and 6i-6k.

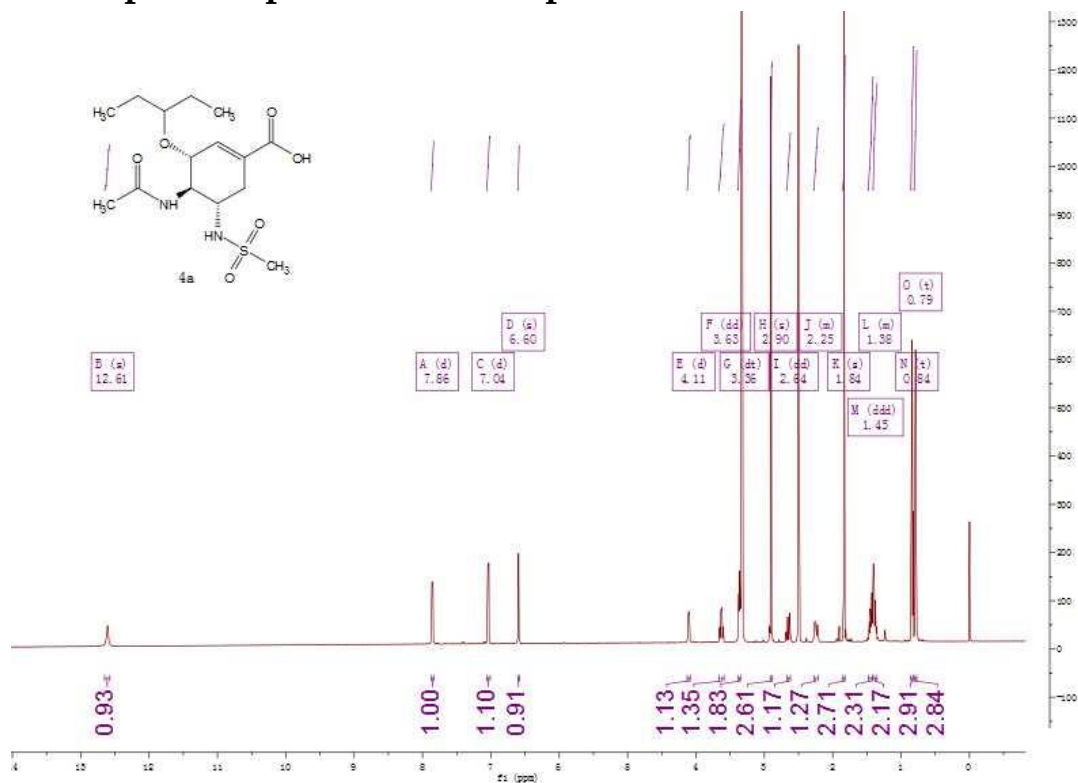

Figure S1. <sup>1</sup>H-NMR of compound 4a.

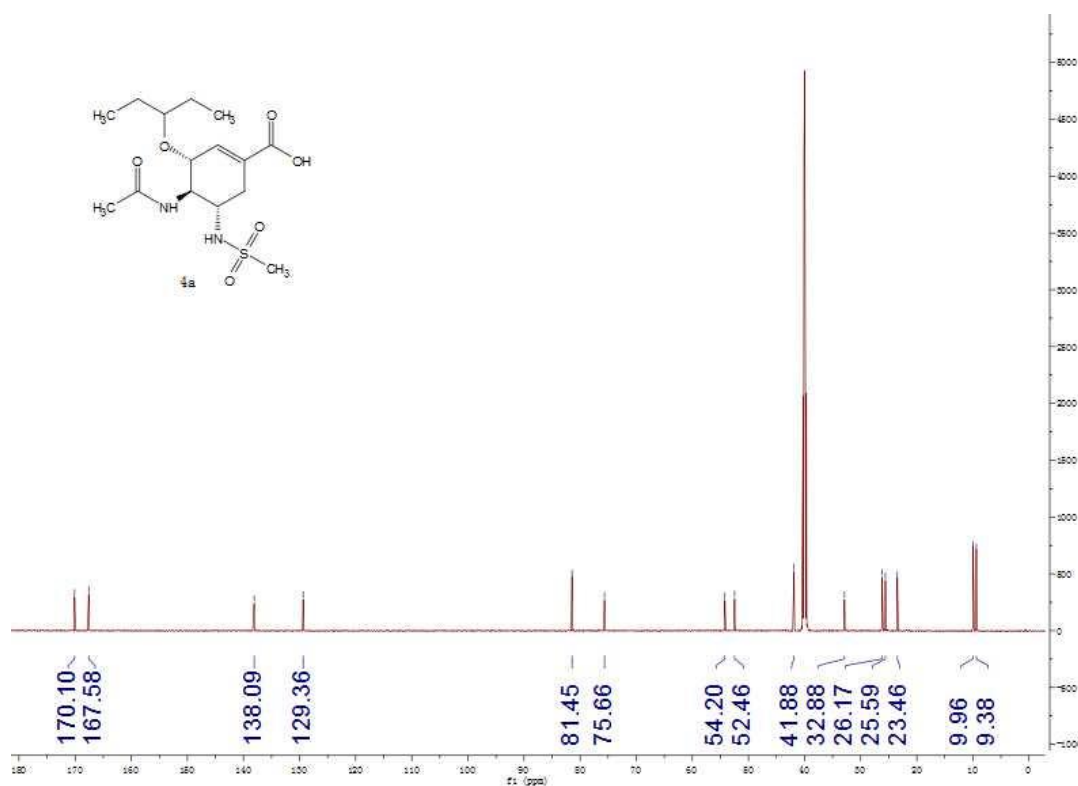

Figure S2. <sup>13</sup>C-NMR of compound 4a.

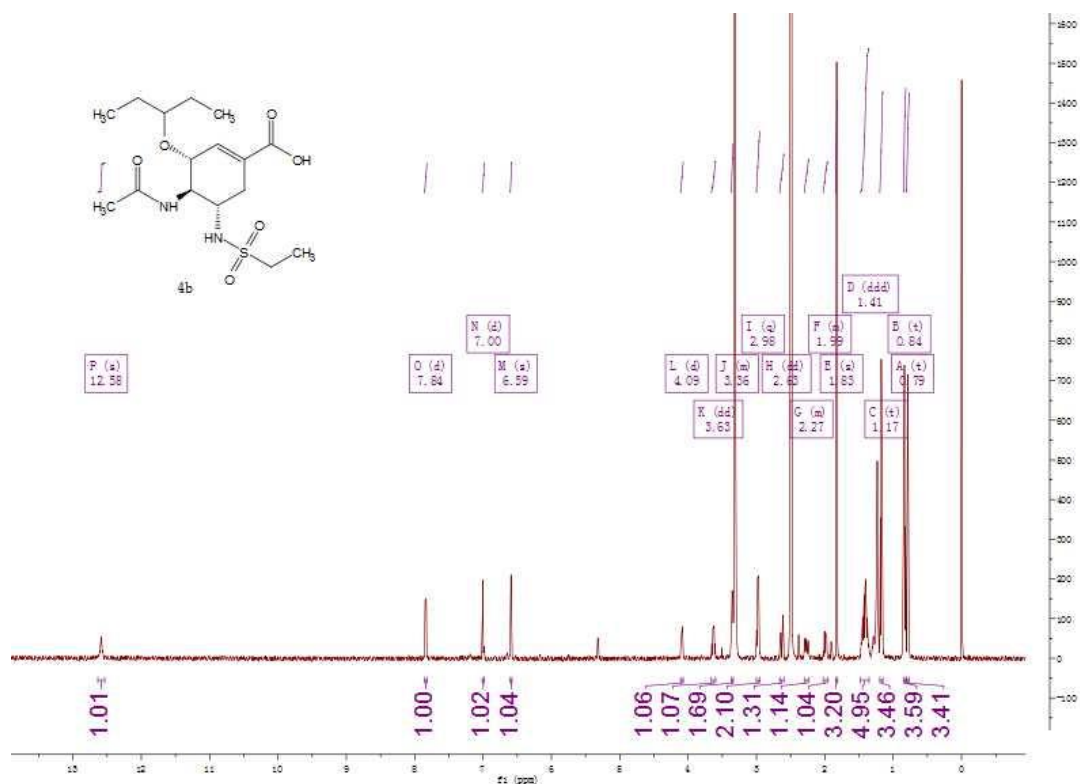

Figure S3. <sup>1</sup>H-NMR of compound 4b.

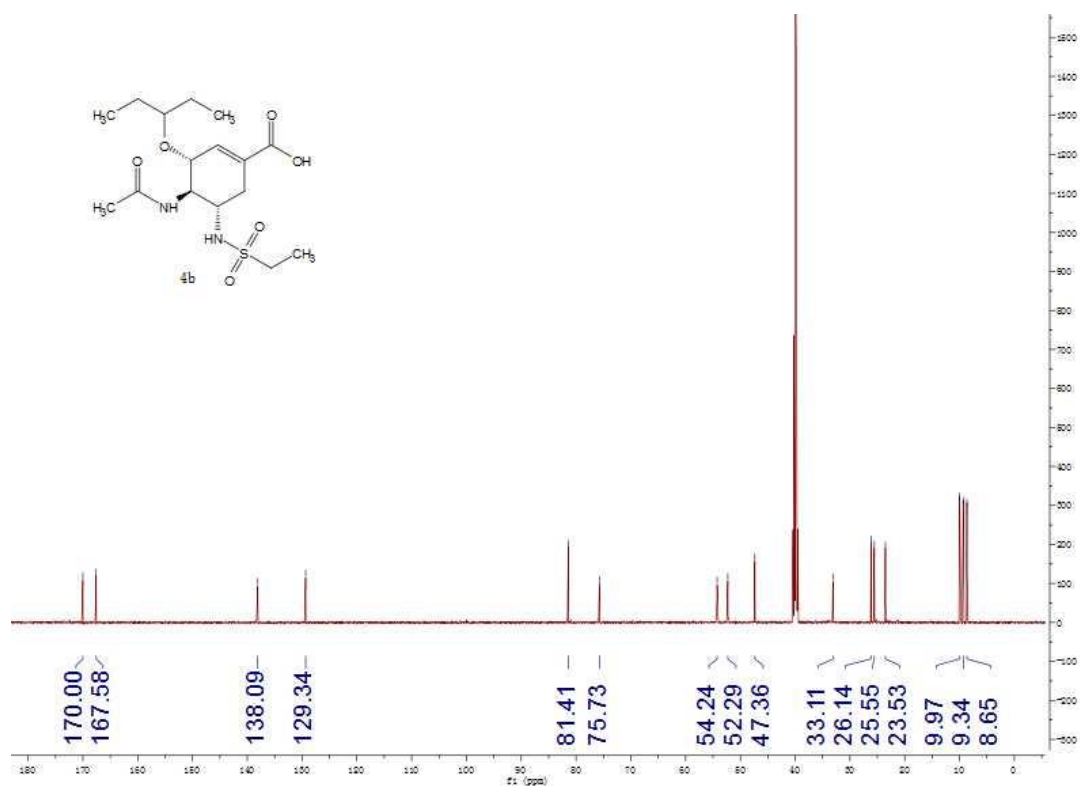

Figure S4. <sup>13</sup>C-NMR of compound 4b.

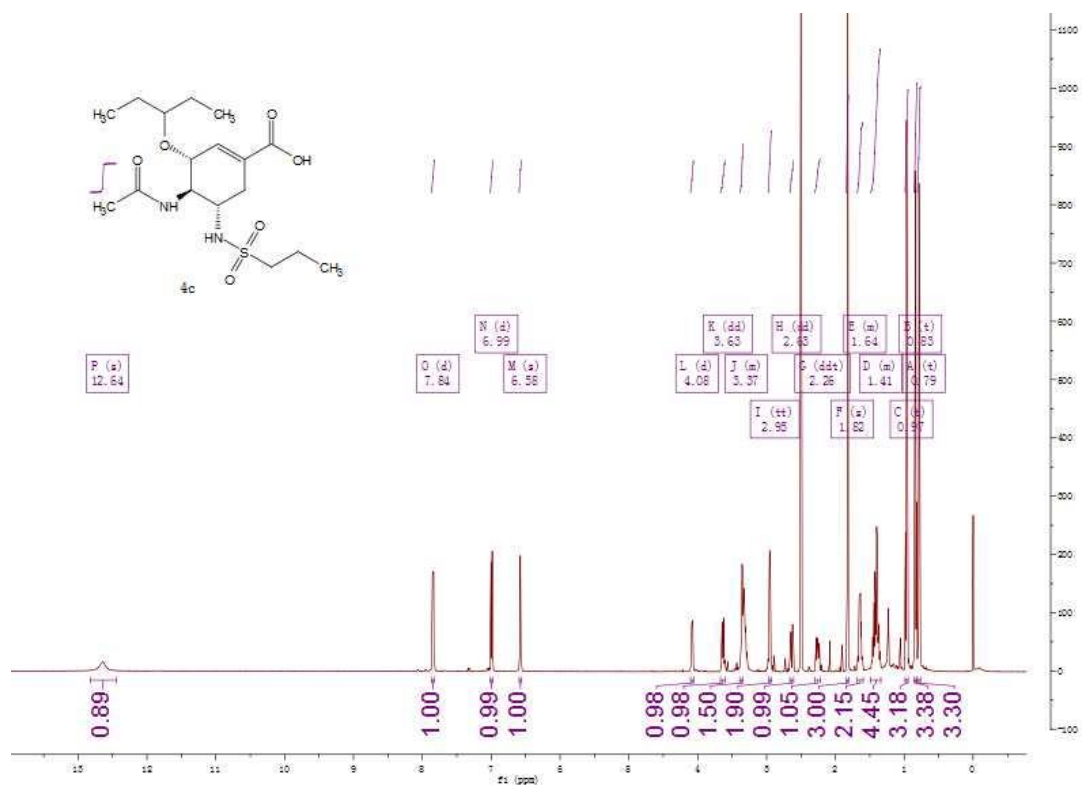

Figure S5. <sup>1</sup>H-NMR of compound 4c.

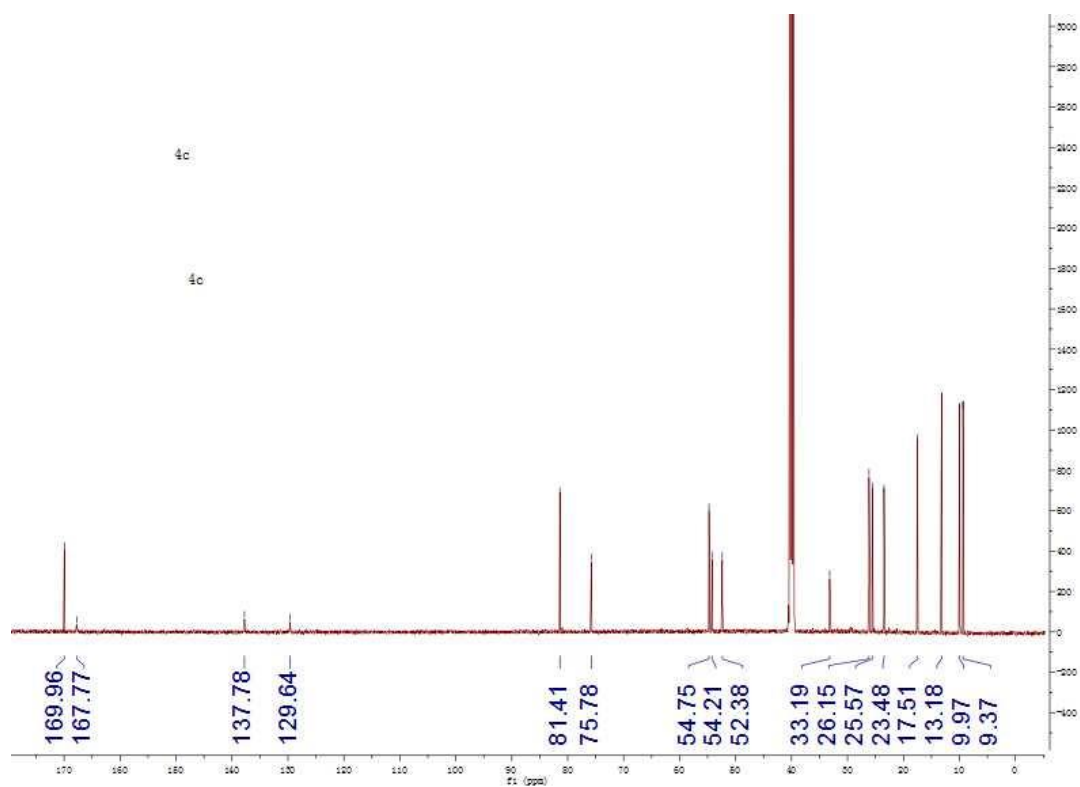

Figure S6. <sup>13</sup>C-NMR of compound 4c.

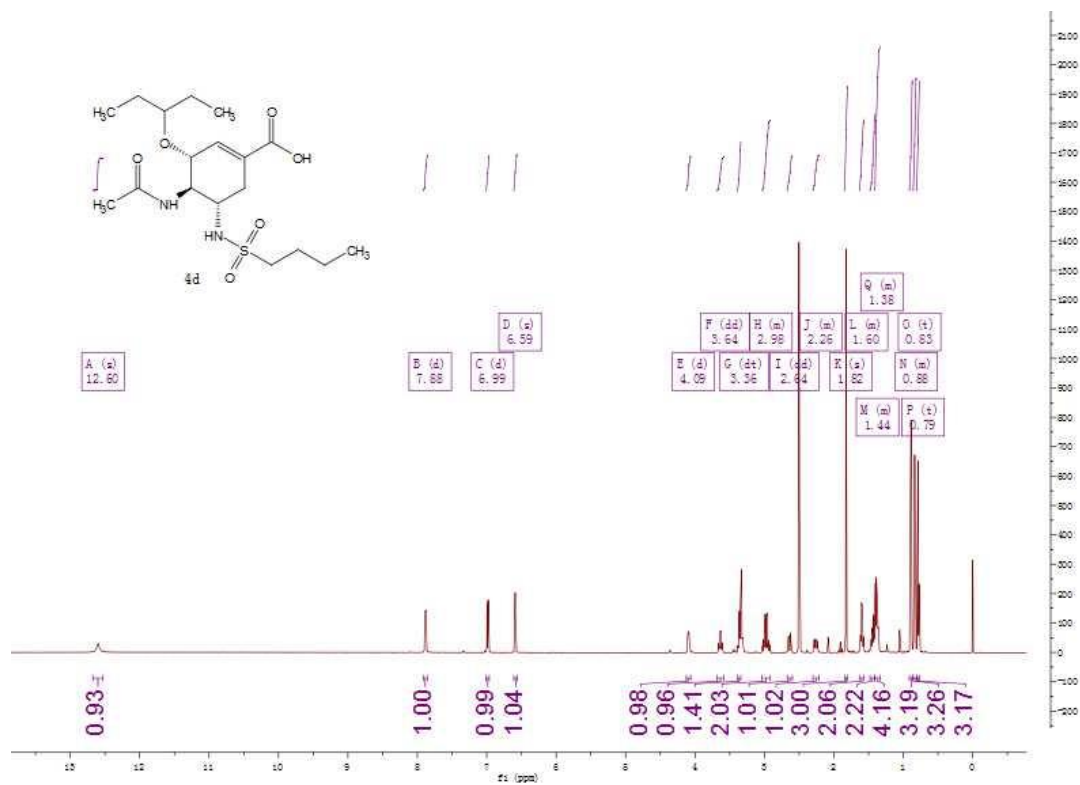

Figure S7. <sup>1</sup>H-NMR of compound 4d.

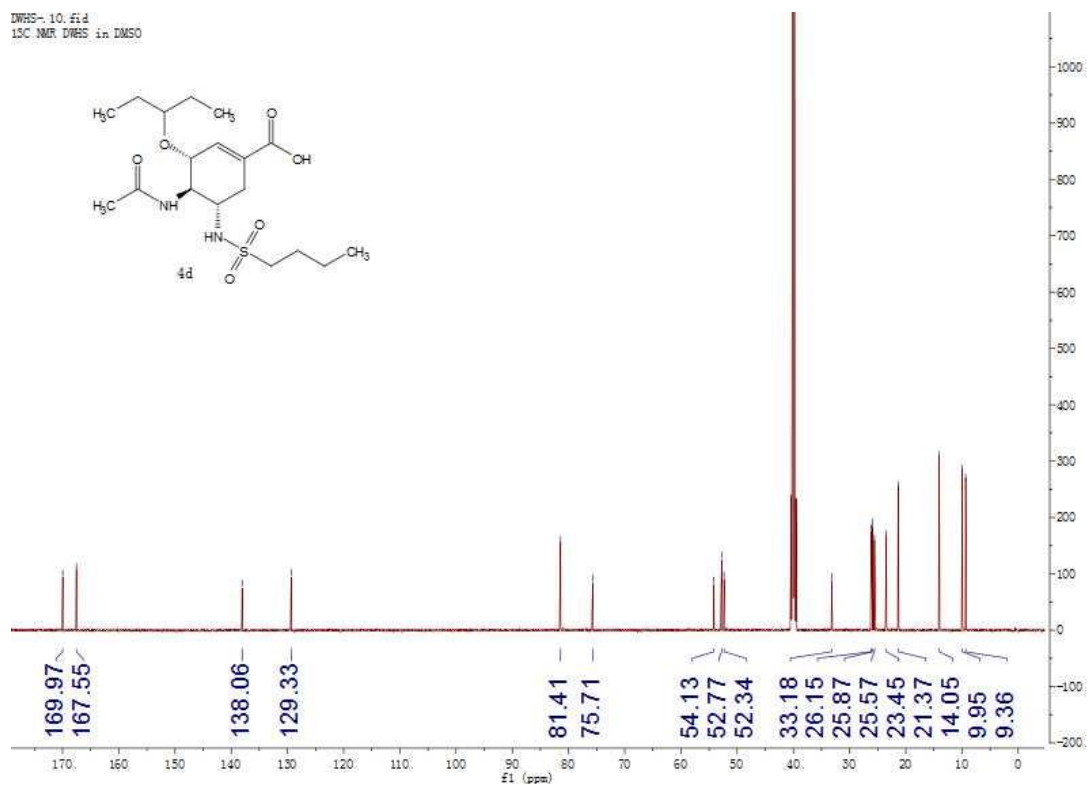

Figure S8. <sup>13</sup>C-NMR of compound 4d.

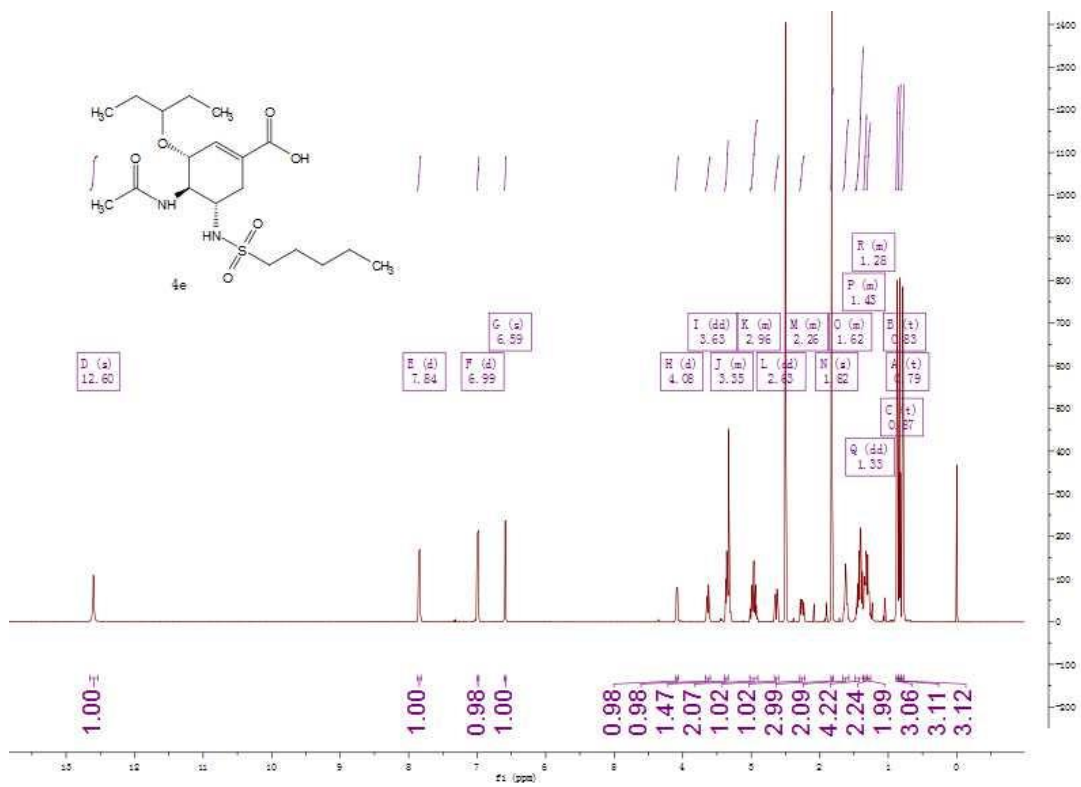

Figure S9. <sup>1</sup>H-NMR of compound 4e.

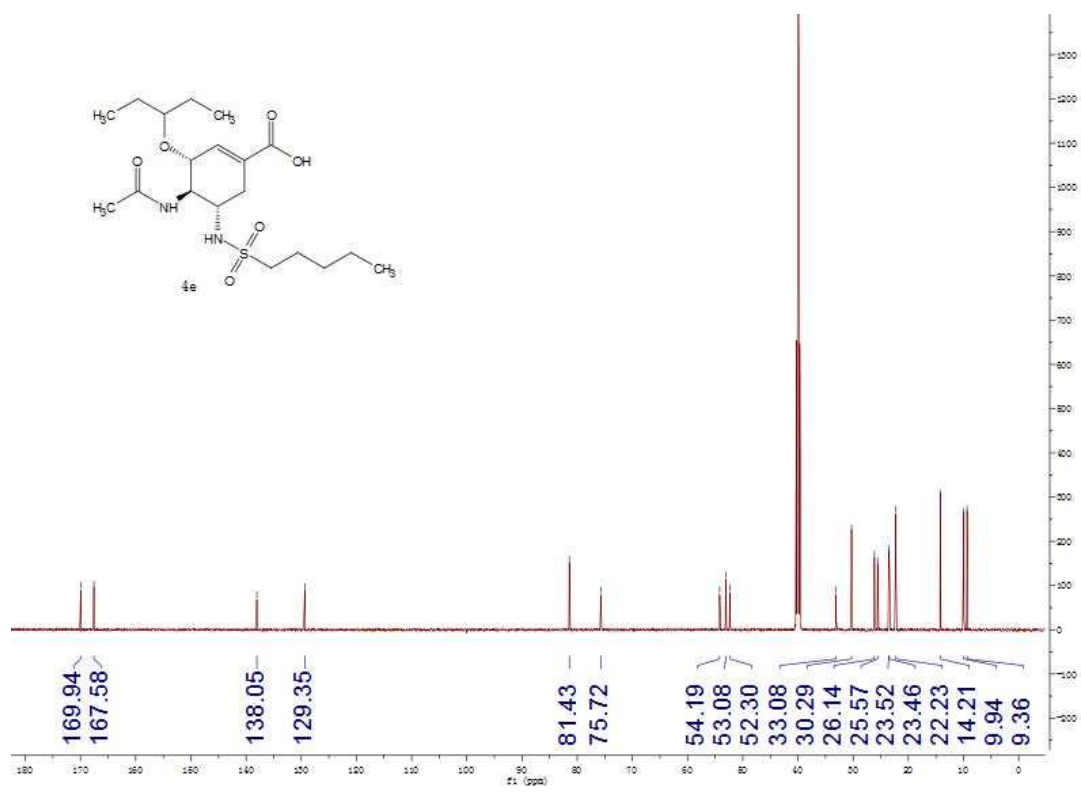

Figure S10. <sup>13</sup>C-NMR of compound 4e.

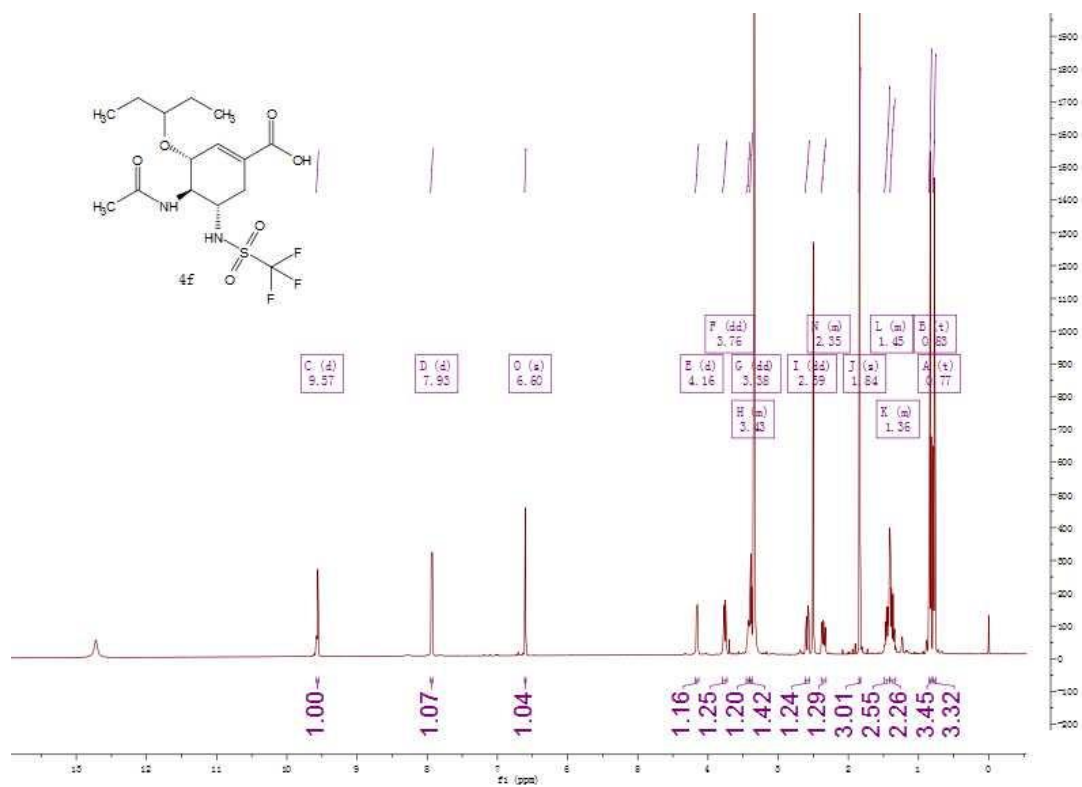

Figure S11. <sup>1</sup>H-NMR of compound 4f.

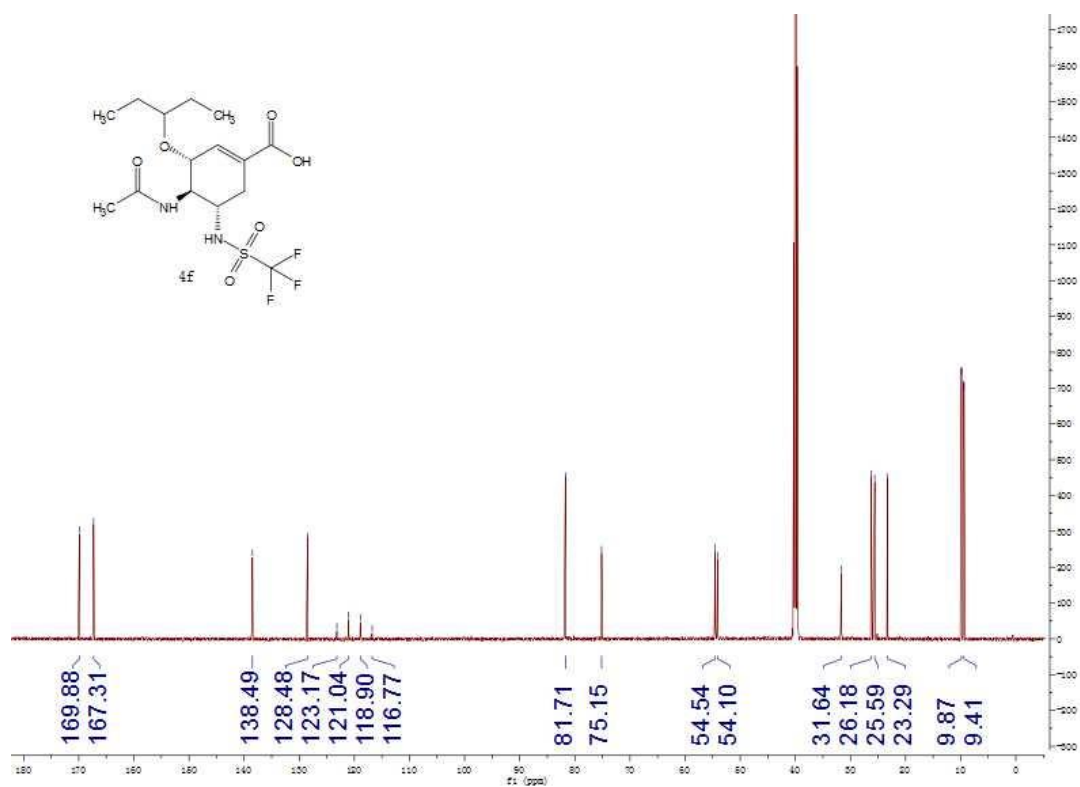

Figure S12. <sup>13</sup>C-NMR of compound 4f.

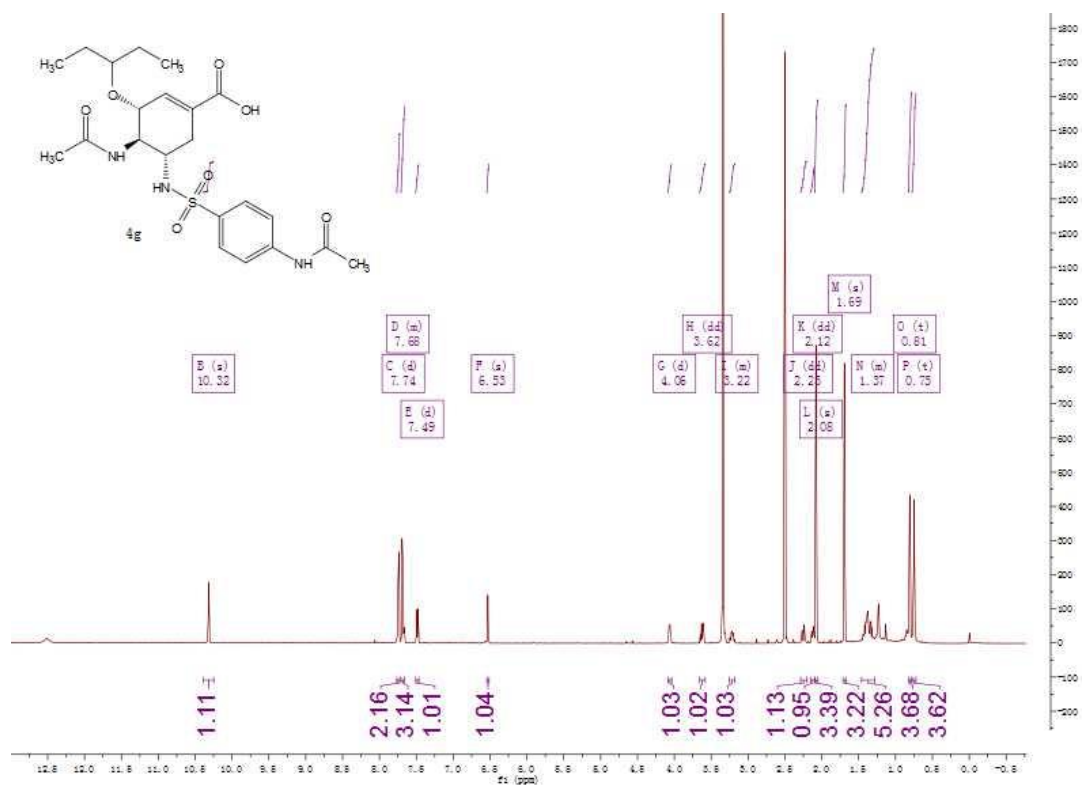

Figure S13. <sup>1</sup>H-NMR of compound 4g.

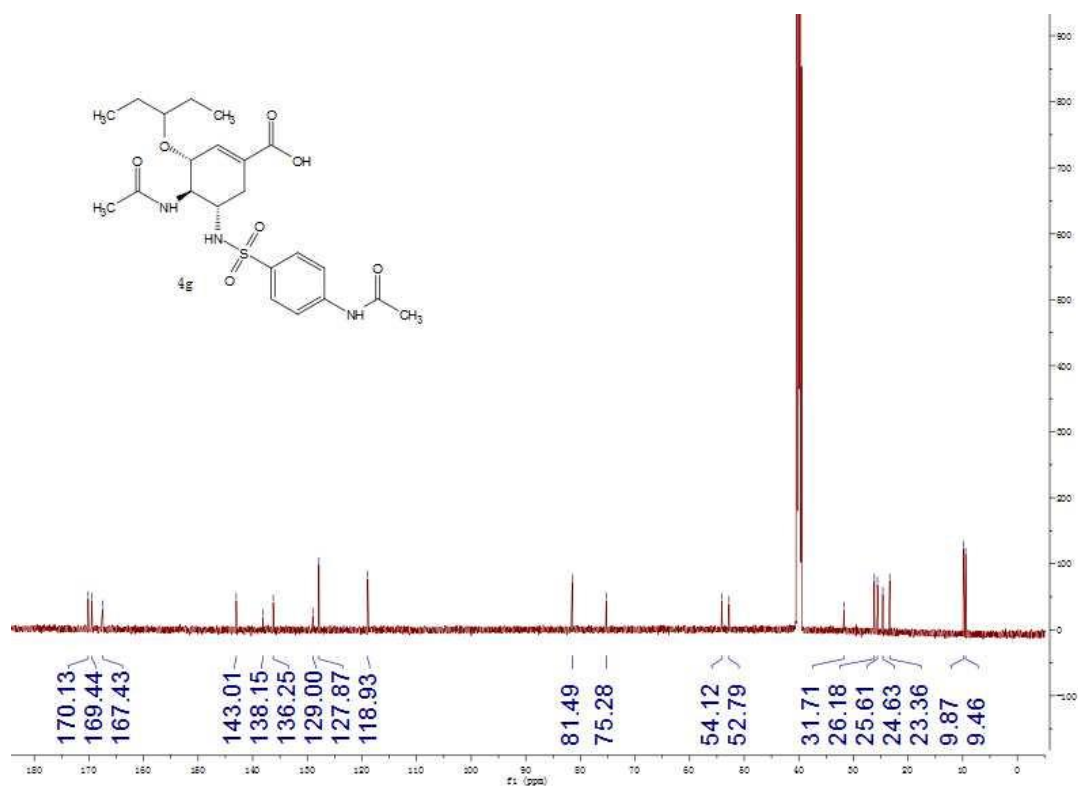

Figure S14. <sup>13</sup>C-NMR of compound 4g.



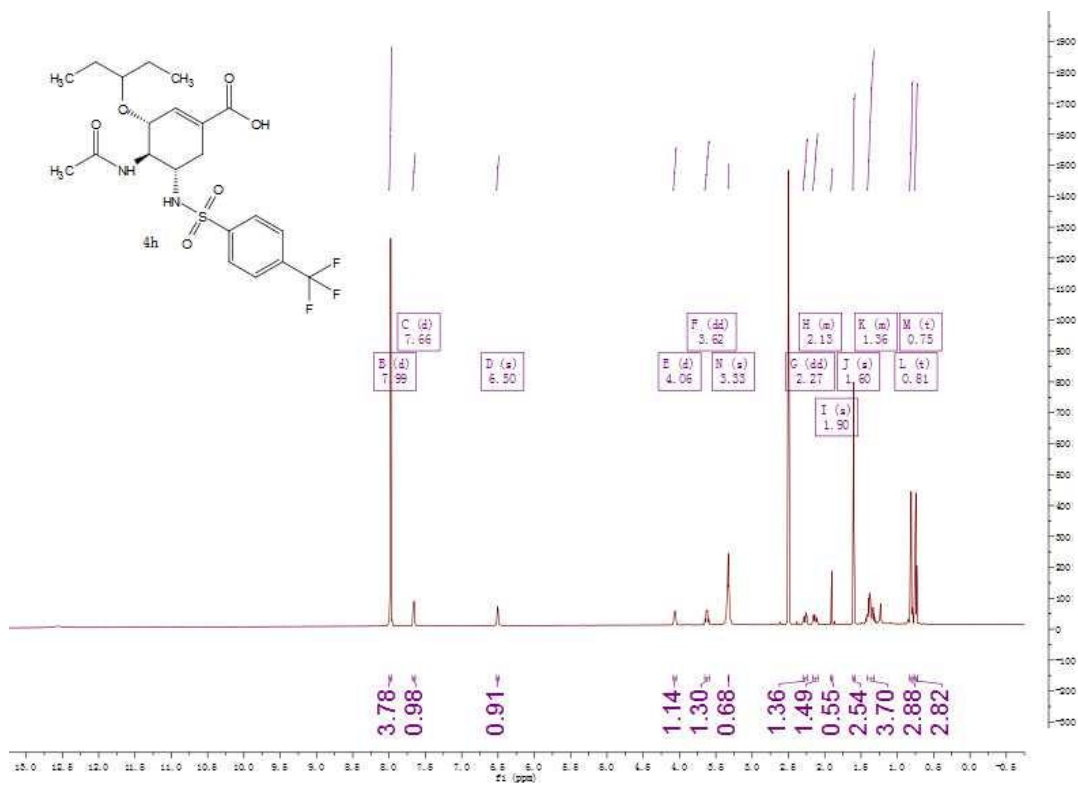

Figure S15. <sup>1</sup>H-NMR of compound 4h.

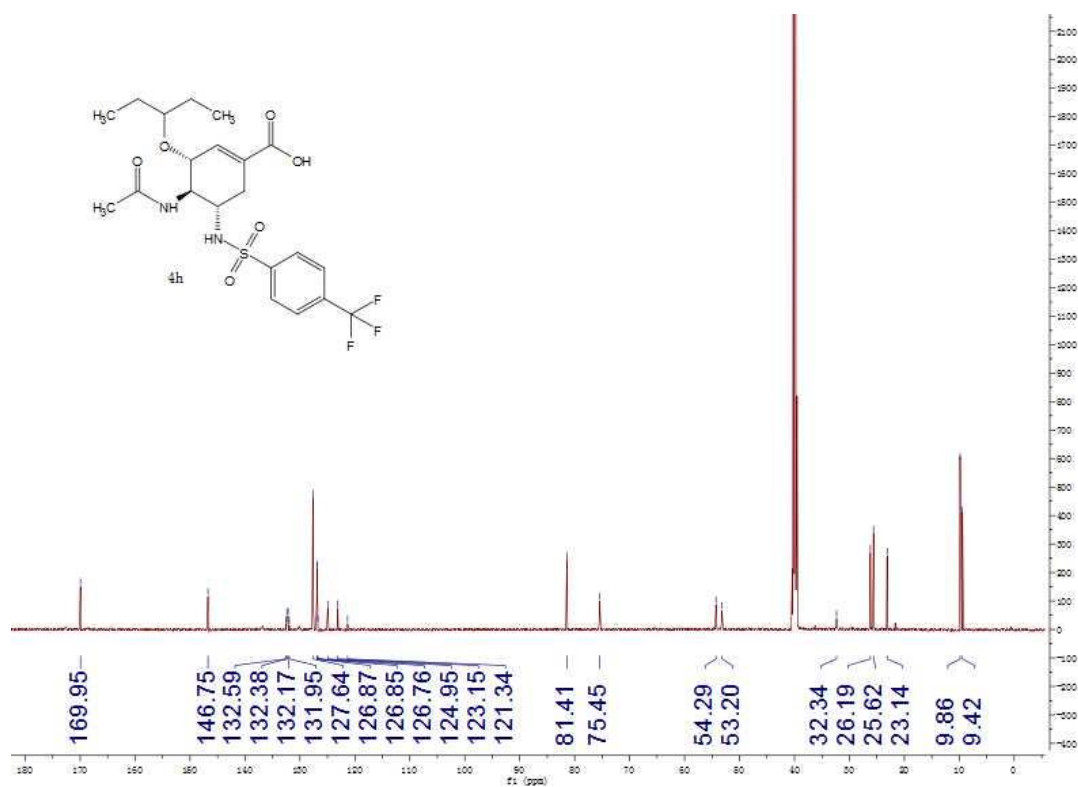

Figure S16. <sup>13</sup>C-NMR of compound 4h.

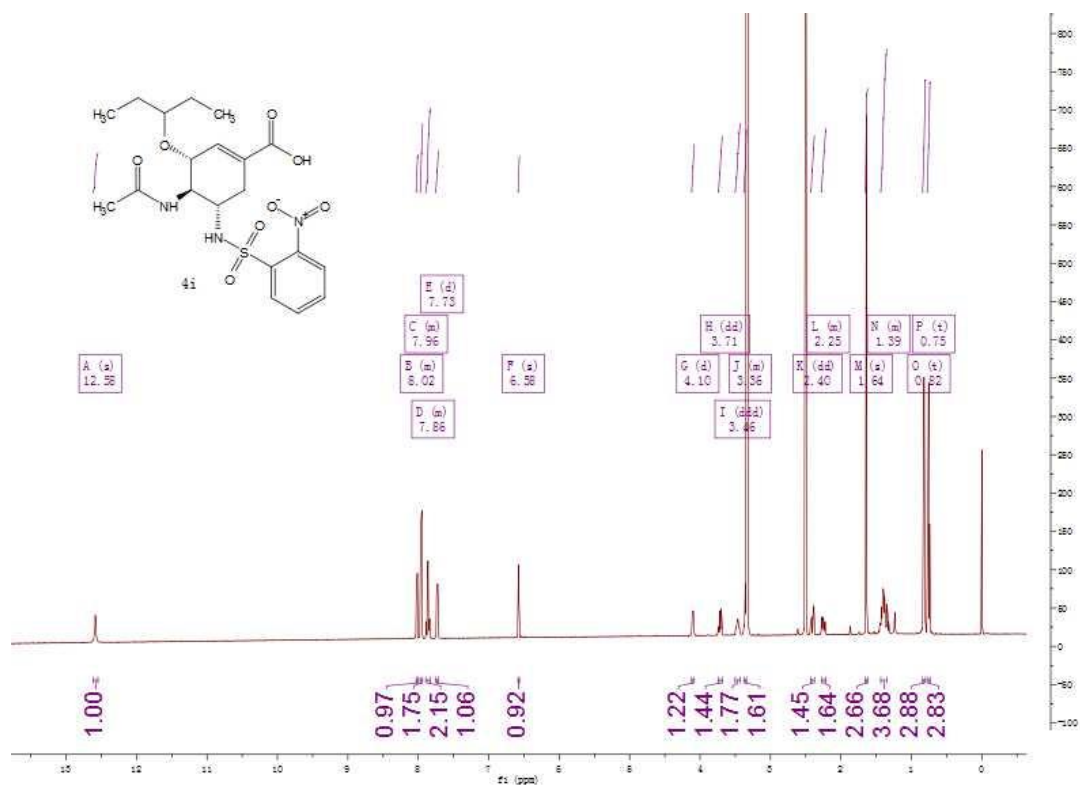

Figure S17. <sup>1</sup>H-NMR of compound 4i.

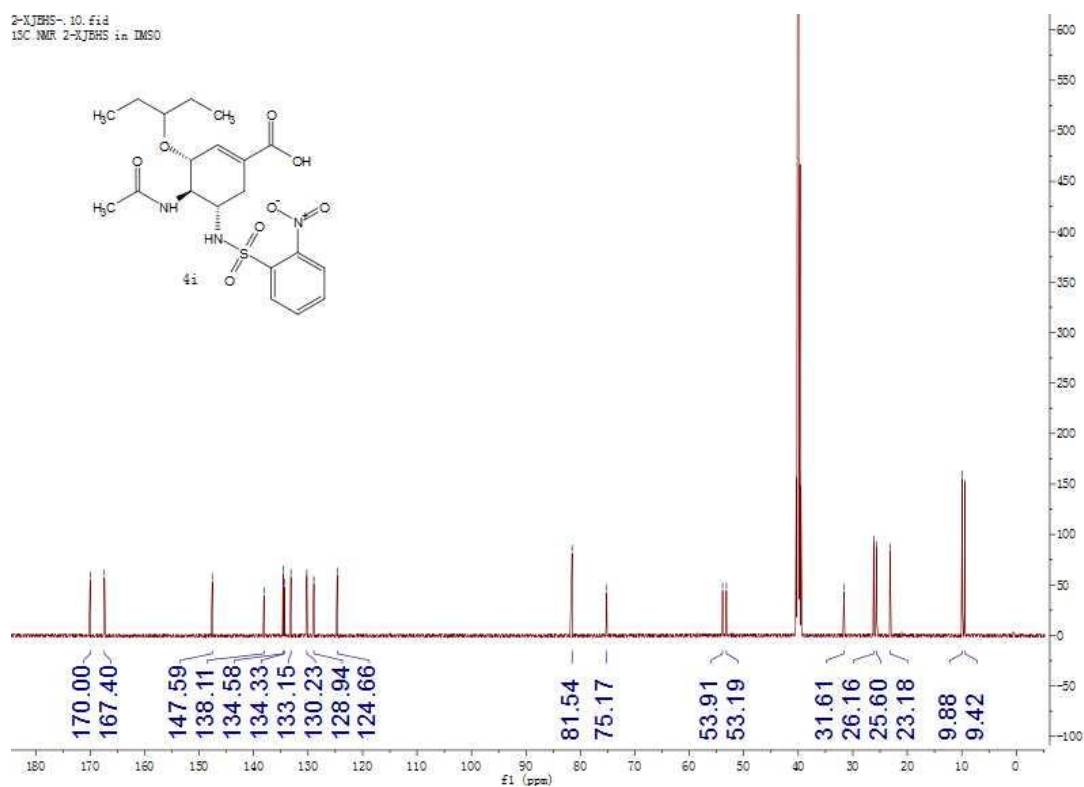

Figure S18. <sup>13</sup>C-NMR of compound 4i.

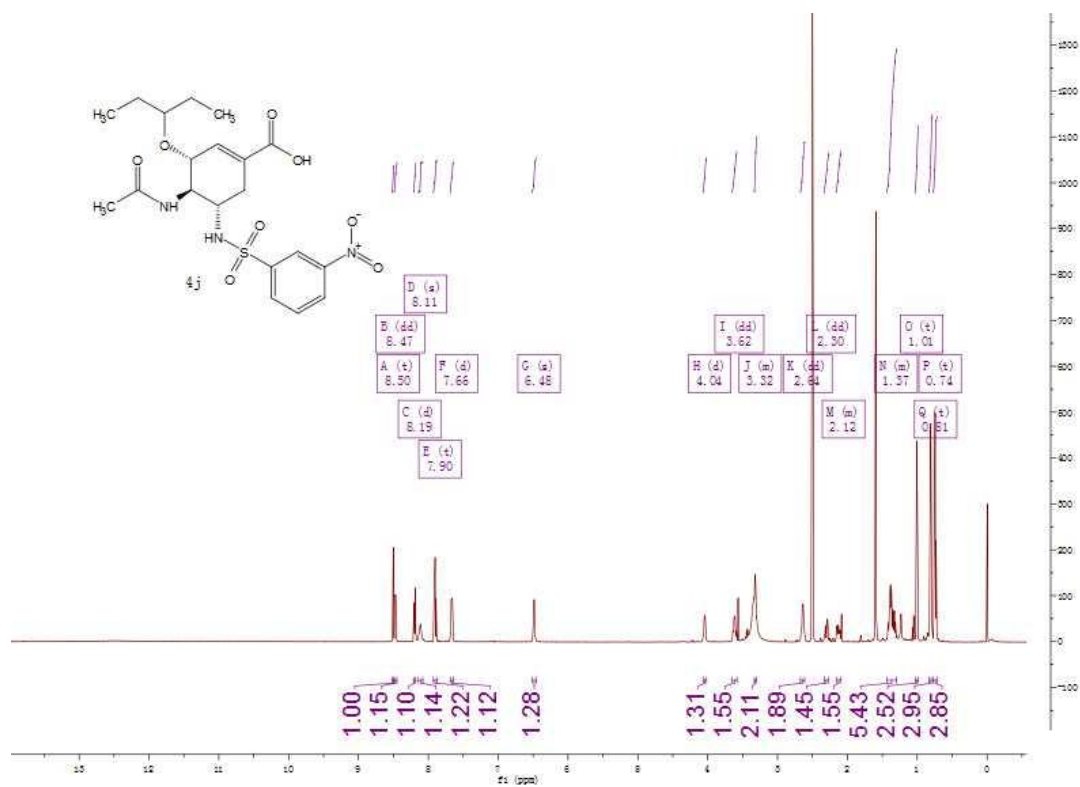

Figure S19. <sup>1</sup>H-NMR of compound 4j.

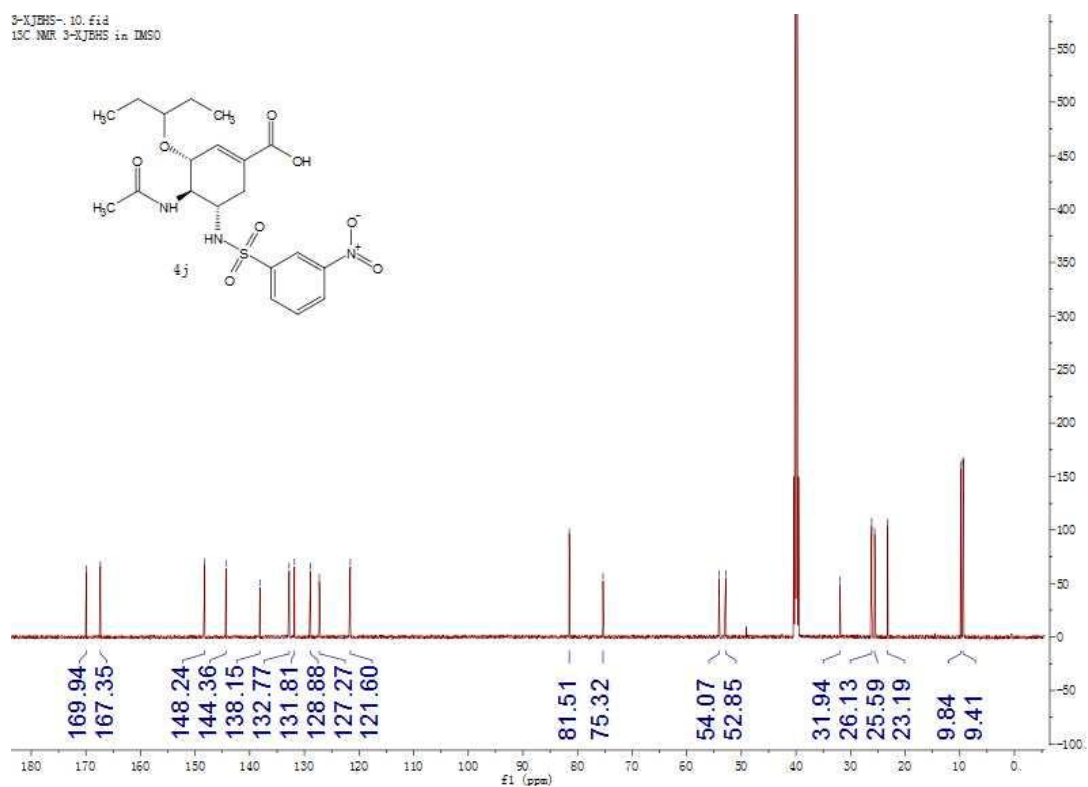

Figure S20. <sup>13</sup>C-NMR of compound 4j.

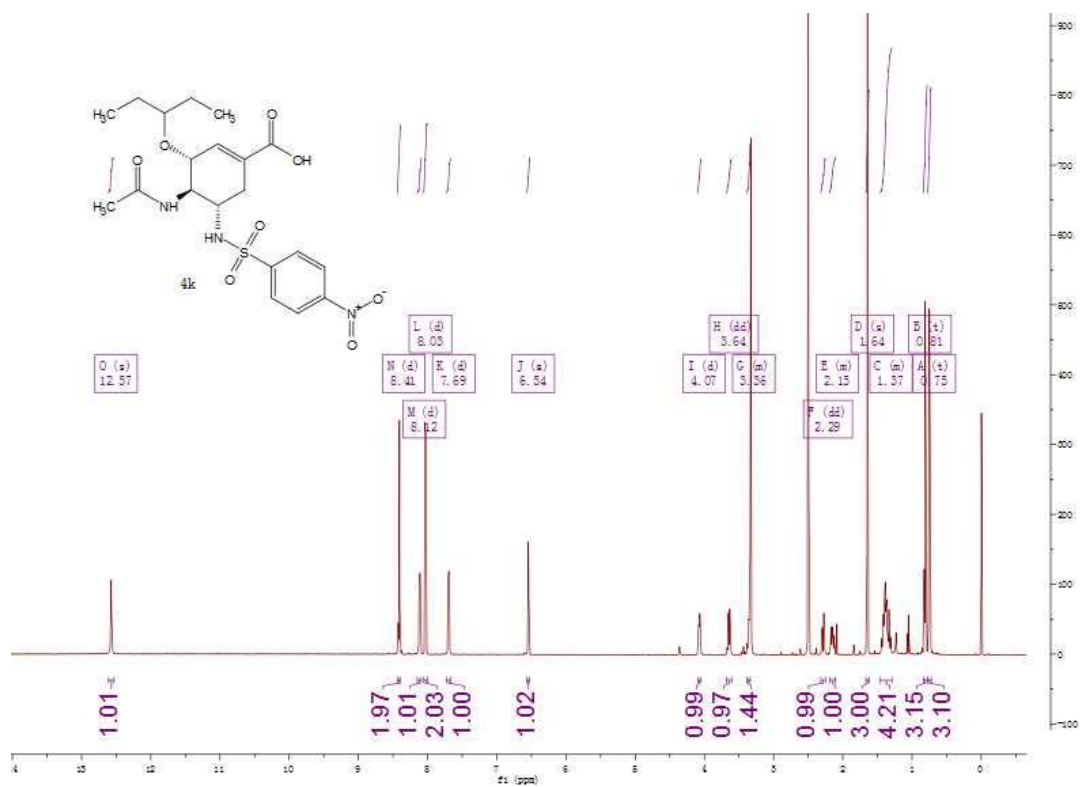

Figure S21. <sup>1</sup>H-NMR of compound 4k.

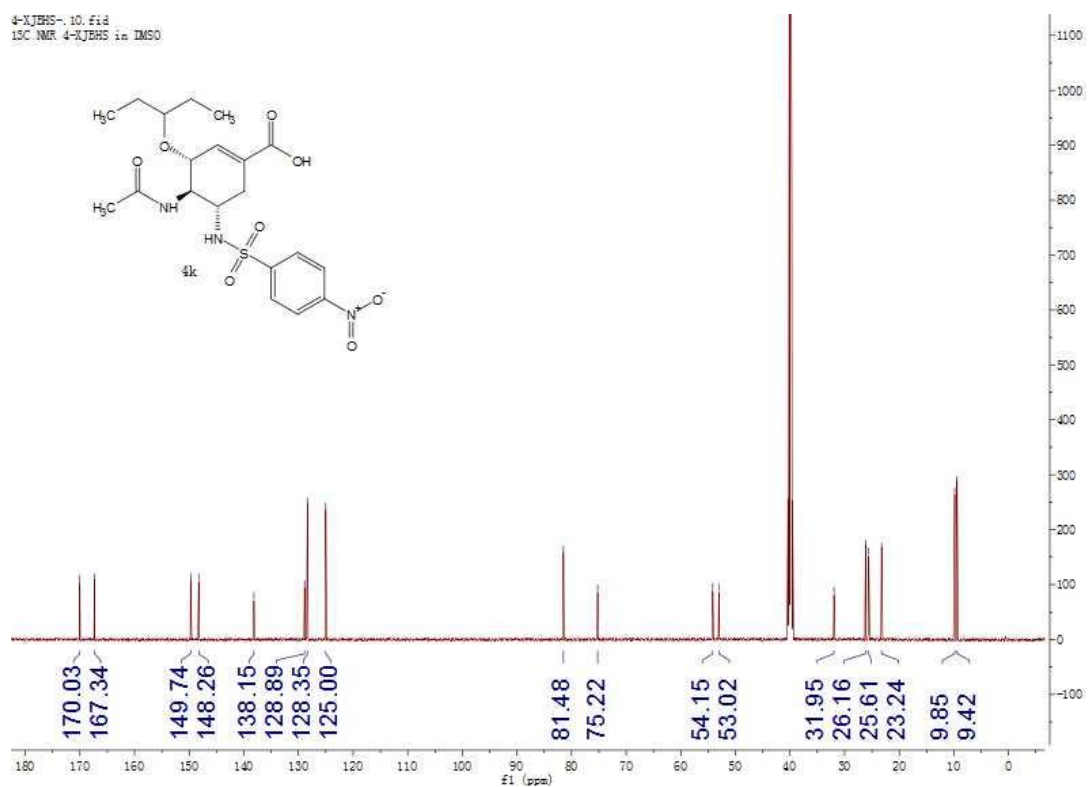

Figure S22. <sup>13</sup>C-NMR of compound 4k.

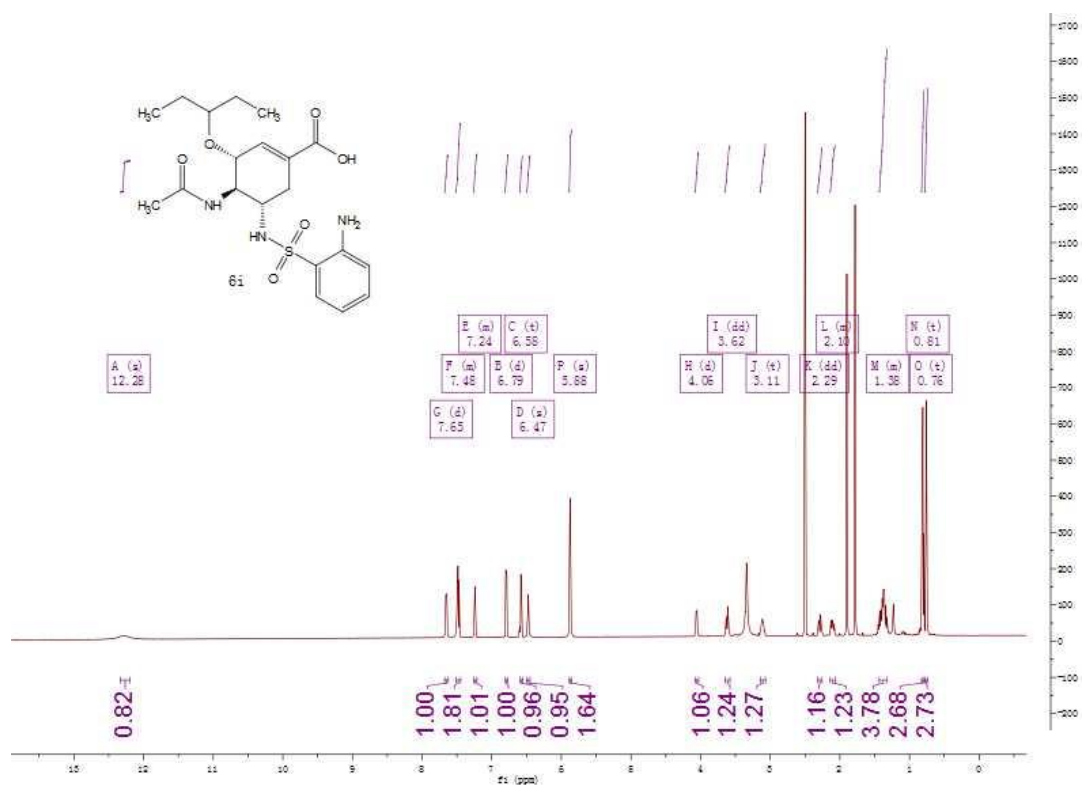

Figure S23.  $^1\text{H-NMR}$  of compound 6i.

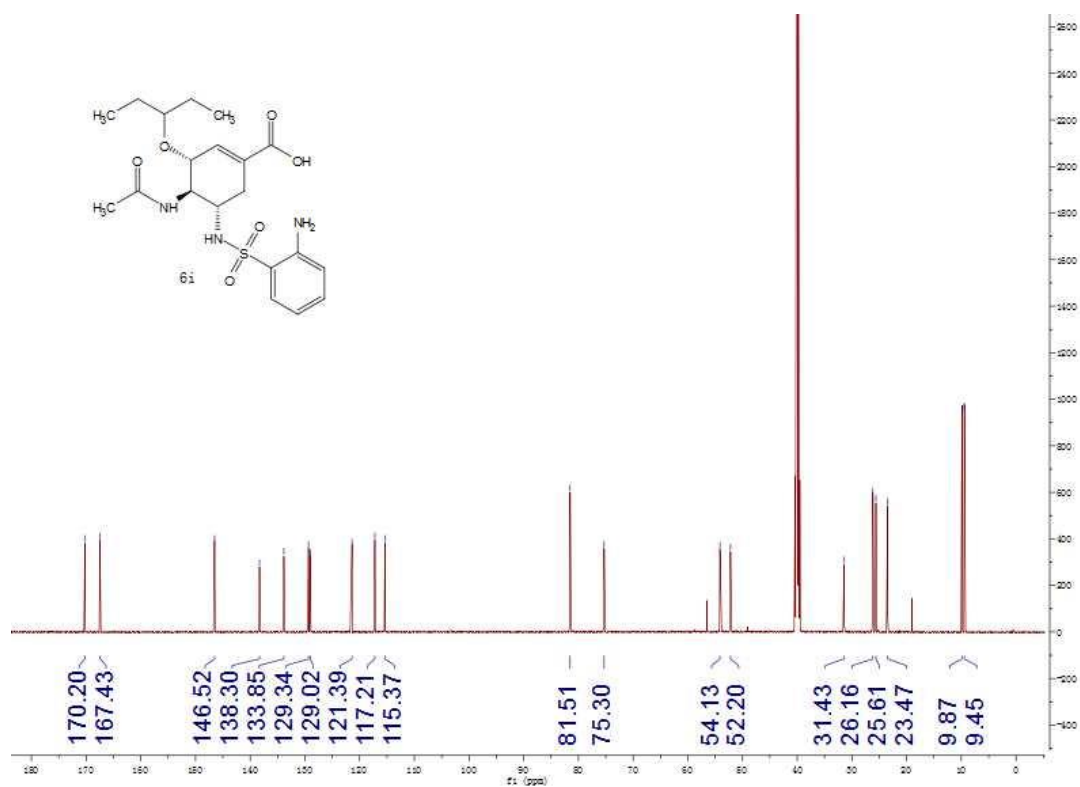

Figure S24.  $^{13}\text{C-NMR}$  of compound 6i.

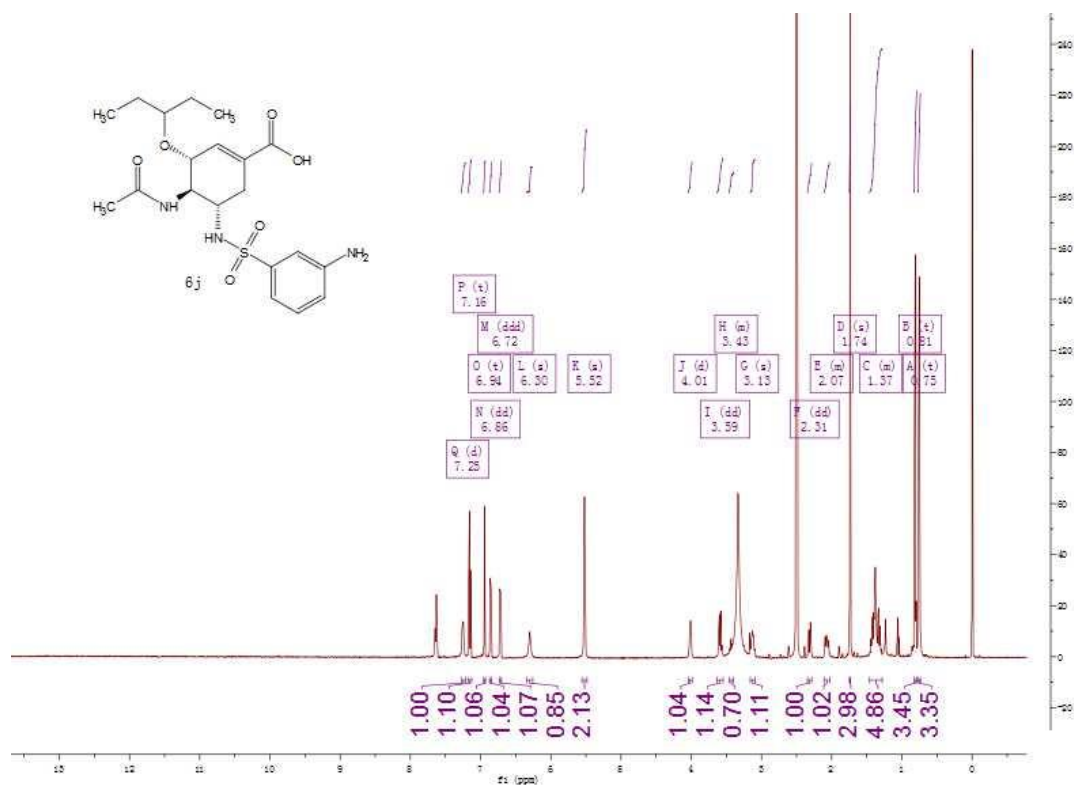

Figure S25. <sup>1</sup>H-NMR of compound 6j.

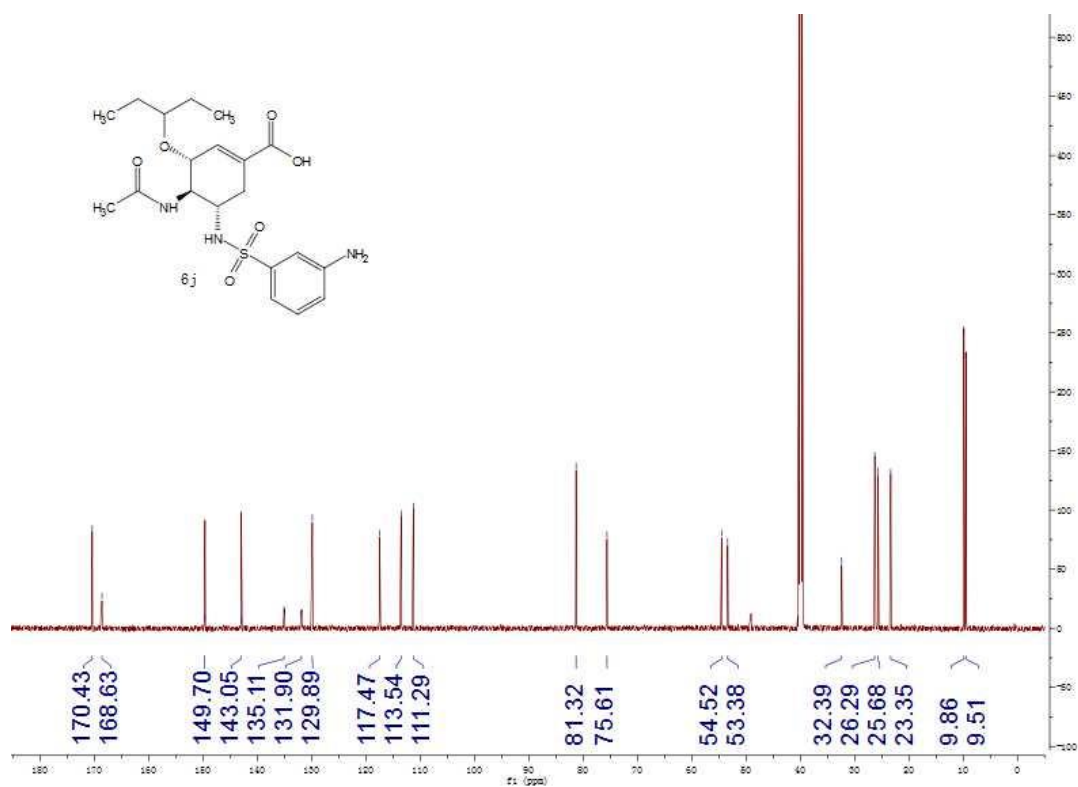

Figure S26. <sup>13</sup>C-NMR of compound 6j.

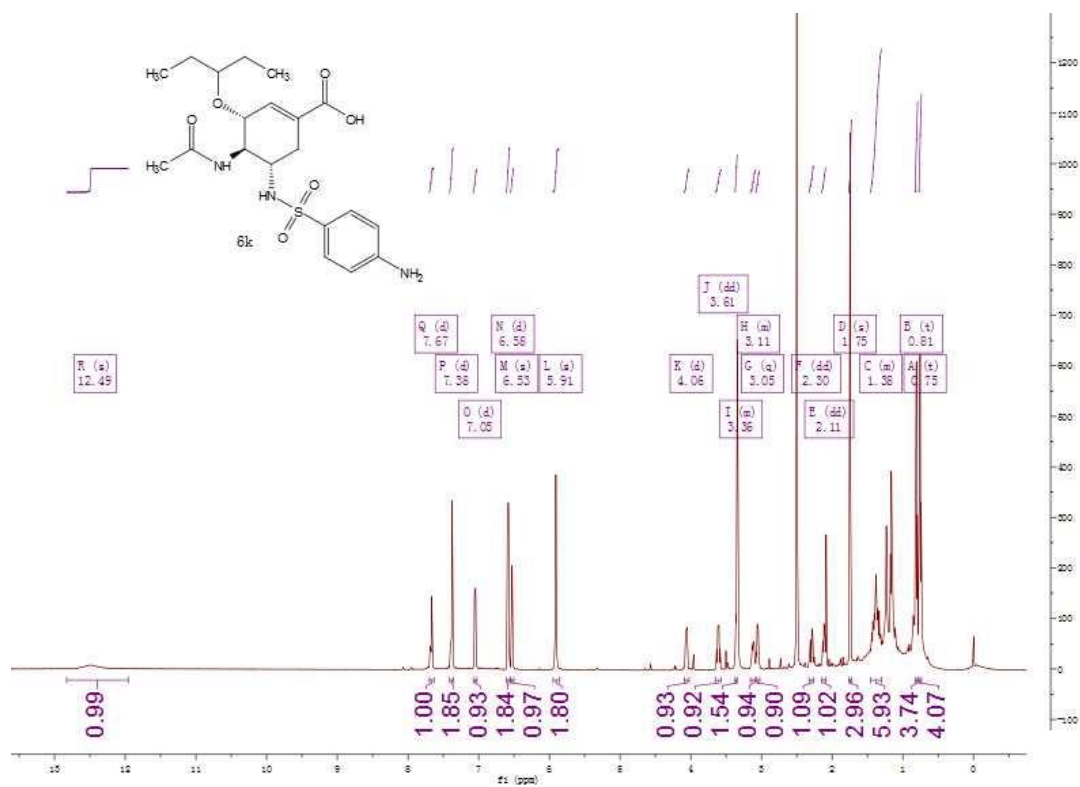

Figure S27. <sup>1</sup>H-NMR of compound 6k.

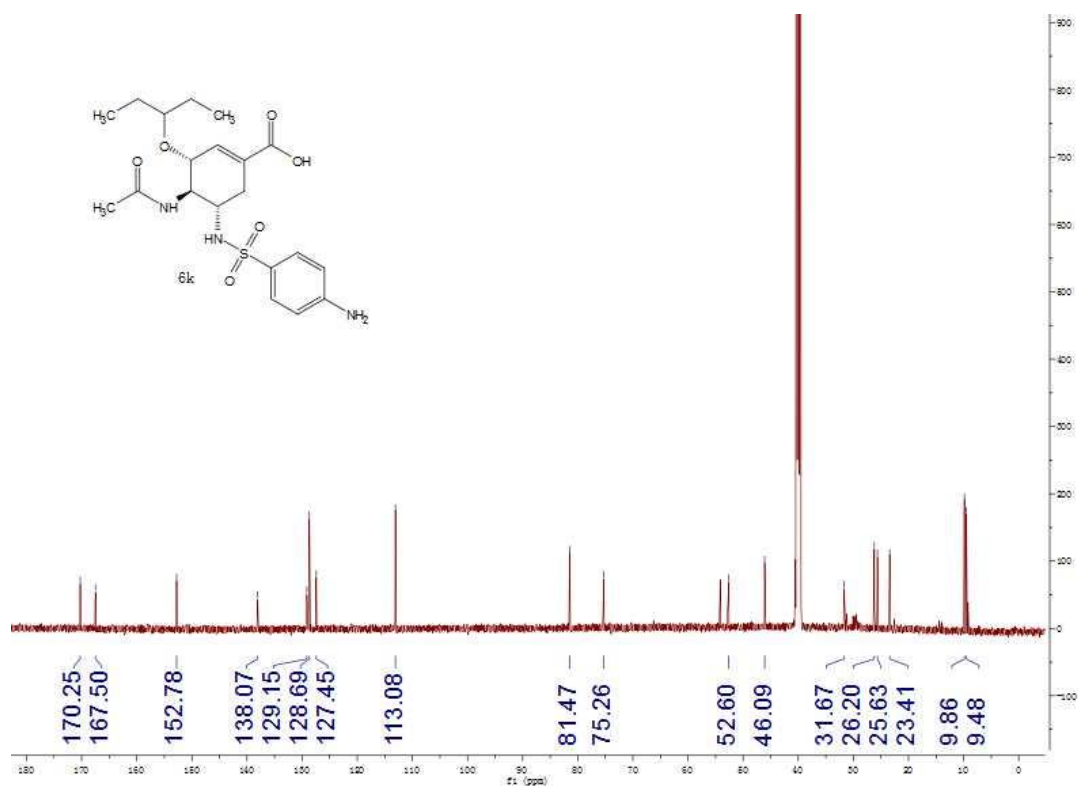

Figure S28. <sup>13</sup>C-NMR of compound 6k.
